# Supplementary material
Source: ML conference proceedings conference paper supplement (https://openaccess.thecvf.com/content/CVPR2024/html/Zheng_OHTA_One-shot_Hand_CVPR_2024_paper.html)
Supplement: Supplementary file 2 [file Zheng_OHTA_One-shot_Hand_CVPR_2024_supplemental.zip]

Archive with 2 entries (2 files):
- 01639_supp.mp4
- 01639_supp.pdf
